# Supplementary material
Source: PubMed Central journal article supplement (PMC5518551)
Supplement: jciinsight-2-92570-s001.pdf [file jciinsight-2-92570-s001.pdf]

## SUPPLEMENTAL MATERIALS

**Supplemental Table 1. List of TCR-BV-CDR3 clonotypes and their off-rate values.**

| Antigenic specificity | Patient/ Donor | Clonotype | BV family | CDR3 (amino acids) | BJ  | Mean koff (s-1) |
|-----------------------|----------------|-----------|-----------|--------------------|-----|-----------------|
| A2/Melan-A            | LAU618         | clono 1   | BV3       | SPPGLSGNIQ         | 2.4 | 0.03338         |
|                       |                | clono 2   | BV3       | SFQGVGTGEL         | 2.2 | 0.02622         |
|                       |                | clono 3   | BV13      | SYGPLSGAGY         | 1.2 | 0.02548         |
|                       |                | clono 4   | BV13      | SPGTLADTQ          | 2.3 | 0.06173         |
|                       |                | clono 5   | BV13      | SAGYGQPQ           | 1.5 | 0.05155         |
|                       |                | clono 6   | BV14      | RAGALQGEQ          | 2.7 | 0.10740         |
|                       |                | clono 7   | BV14      | SPAALSGAYEQ        | 2.7 | 0.10100         |
|                       |                | clono 8   | BV17      | SPGALNTEA          | 1.1 | 0.06438         |
|                       |                | clono 9   | BV3       | SFPRWGRNYSYNEQ     | na  | 0.03492         |
|                       |                | clono 10  | BV14      | SLSAGTGVLDTQ       | na  | 0.09449         |
|                       |                | clono 11  | BV17      | SIGA--EHEQ         | na  | 0.09964         |
|                       |                | clono 12  | BV17      | SIEALQGFEA         | na  | 0.04187         |
|                       |                | clono 13  | BV17      | RWGVLNTEA          | na  | 0.01835         |
| A2/NY-ESO-1           | LAU155         | clono 1   | BV1       | SVATGGDTQ          | 2.3 | 0.01875         |
|                       |                | clono 2   | BV8       | NSGSNEQ            | 2.1 | 0.02771         |
|                       |                | clono 3   | BV8       | SLGSTEA            | 1.1 | 0.00831         |
|                       |                | clono 4   | BV8       | NSGANEQ            | 2.1 | 0.02026         |
|                       |                | clono 5   | BV8       | RKGPNEQ            | 2.1 | 0.03529         |
|                       |                | clono 6   | BV13      | SYVGAAGEL          | 2.2 | 0.02918         |
|                       |                | clono 7   | BV13      | SLTGGLNSPL         | na  | 0.03146         |
|                       |                | clono 8   | BV1       | SLATGEDTQ          | na  | 0.01574         |
|                       |                | clono 9   | BV13      | LGDGDGAYNSPL       | 1.6 | 0.03277         |
|                       | LAU50          | clono 10  | BV8       | QQGGTEA            | 1.1 | 0.01572         |
|                       |                | clono 11  | BV8       | SLGGTEA            | 1.1 | 0.01975         |
|                       |                | clono 12  | BV13      | RTGLDGY            | 1.2 | 0.03094         |
|                       |                | clono 13  | BV13      | SYVGGKAEA          | 1.2 | 0.02612         |
| A2/CMV-pp65           | BCL4           | clono 1   | BV1       | SVYGGAGNSPL        | 1.6 | 0.00866         |
|                       |                | clono 2   | BV1       | SYPGGNTI           | 1.3 | 0.01797         |
|                       |                | clono 3   | BV3       | SFLGYTEA           | 1.1 | 0.01174         |
|                       |                | clono 4   | BV8       | SSVNEA             | 1.1 | 0.00646         |
|                       |                | clono 5   | BV8       | SSAGGAVYGY         | 1.2 | 0.02039         |
|                       |                | clono 6   | BV9       | SLLLGTAAEA         | 1.1 | 0.00313         |
|                       |                | clono 7   | BV14      | RLLAGGRSAQ         | 2.5 | 0.00608         |
|                       |                | clono 8   | BV3       | SFSSPGQGSTDQ       | 2.3 | 0.01285         |
|                       |                | clono 9   | BV8       | SSVLEA             | 1.1 | 0.01002         |
|                       |                | clono 10  | BV8       | SLVGGVDGY          | 1.2 | 0.03013         |
|                       |                | clono 11  | BV8       | SIMDYGY            | 1.2 | 0.03125         |
|                       |                | clono 12  | BV13      | SAVTGAVDQPQ        | 1.5 | 0.01642         |
|                       |                | clono 13  | BV13      | SYFYEQ             | 2.7 | 0.00251         |
|                       |                | clono 14  | BV13      | SYSTGTAYGY         | 1.2 | 0.00289         |
|                       |                | clono 15  | BV13      | SPKTGVPYEQ         | 2.7 | 0.02146         |
|                       | BCL6           | clono 16  | BV8       | SSANYGY            | 1.2 | 0.01505         |
|                       |                | clono 17  | BV13      | SRQTGAAYGY         | 1.2 | 0.00617         |
|                       |                | clono 18  | BV13      | SYATGTAYGY         | 1.2 | 0.00530         |
| A2/EBV-BMFL1          | BCL4           | clono 1   | BV2       | RDRTGNGY           | 1.2 | 0.005131        |
|                       |                | clono 2   | BV2       | RDSVGNNGY          | 1.2 | 0.002706        |
|                       |                | clono 3   | BV2       | RDRVGNNGY          | 1.2 | 0.001934        |
|                       |                | clono 4   | BV2       | RDSTGNGY           | 1.2 | 0.004689        |
|                       |                | clono 5   | BV2       | RVEPGNGY           | 1.2 | 0.009871        |
|                       |                | clono 6   | BV4       | VGTGGTNEKL         | 1.4 | 0.014417        |
|                       |                | clono 7   | BV4       | VGYGGTNEKL         | 1.4 | 0.013503        |
|                       |                | clono 8   | BV4       | VGSGGTNEKL         | 1.4 | 0.045620        |
|                       |                | clono 9   | BV16      | SQSPGGTQ           | 2.5 | 0.009123        |
|                       |                | clono 10  | BV16      | SQSPGGEA           | 1.1 | 0.003469        |
|                       |                | clono 11  | BV16      | SQSPGGTS           | na  | 0.003878        |
|                       |                | clono 12  | BV18      | SPPAVSYEQ          | 2.7 | 0.016529        |
|                       |                | clono 13  | BV2       | DGY                | 1.2 | 0.017560        |

**Supplemental Table 2. List of antibodies used in this study.**

| <b>Name</b>              | <b>Company</b>  | <b>Catalog no</b> | <b>Clone no</b> |
|--------------------------|-----------------|-------------------|-----------------|
| APC anti-CD28            | BD Pharmigen    | 559770            | CD28.2          |
| FITC anti-CD45RA         | BD Pharmigen    | 561882            | HI100           |
| FITC anti-CD107a         | BD Pharmigen    | 555800            | H4A3            |
| PerCPCy5.5 anti-IL2      | BD Pharmigen    | 560708            | MQ1-17H12       |
| APC anti-IL13            | BD Pharmigen    | 561162            | JES10-5A2       |
| PE-Cy7 anti-IFN $\gamma$ | BD Pharmigen    | 557844            | 4S.B3           |
| A700 anti-TNF $\alpha$   | BD Pharmigen    | 557996            | MAb11           |
| PE-Cy7 anti-CD5          | BD Pharmigen    | 348810            | L17F12          |
| APC anti-CD137           | BD Pharmigen    | 550890            | 4B4-1           |
| PE anti-VLA-1            | BD Pharmigen    | 559596            | SR84            |
| APC anti-VLA-4           | BD Pharmigen    | 561794            | MAR4 .          |
| BrV421 anti-PD1          | BD Pharmigen    | 562516            | EH12.1          |
| APC-A750 anti-CD8        | Beckman Coulter | A94683            | B9.11           |
| Pacific-blue anti-CD8    | Beckman Coulter | A82791            | B9.11           |
| FITC anti-CD8beta        | Beckman Coulter | IM2217U           | 2ST8.5H7        |
| PE-Cy7 anti-CD8alpha     | Beckman Coulter | 737661            | SFCI21Thy2D3    |
| PE anti-pan-TCRab        | Beckman Coulter | A39499            | IP26A           |
| PE-Cy7 anti-CCR7         | Biolegend       | 353226            | G043H7          |
| PE anti-IL4              | Biolegend       | 500810            | MP4-25D2        |
| BrV421 anti-CD28         | Biolegend       | 302930            | CD28.2          |
| A488 anti-PD1            | AbD Serotech    | MCA2628A488       | MIH4            |
| APC anti-TIGIT           | eBioscience     | 17-9500-42        | MBSA43          |
| FITC anti-LAG-3          | Enzo            | ALX-804-806F-C100 | 17B4            |
| PE anti-TIM-3            | R&D systems     | FAB2365P          | 344823          |

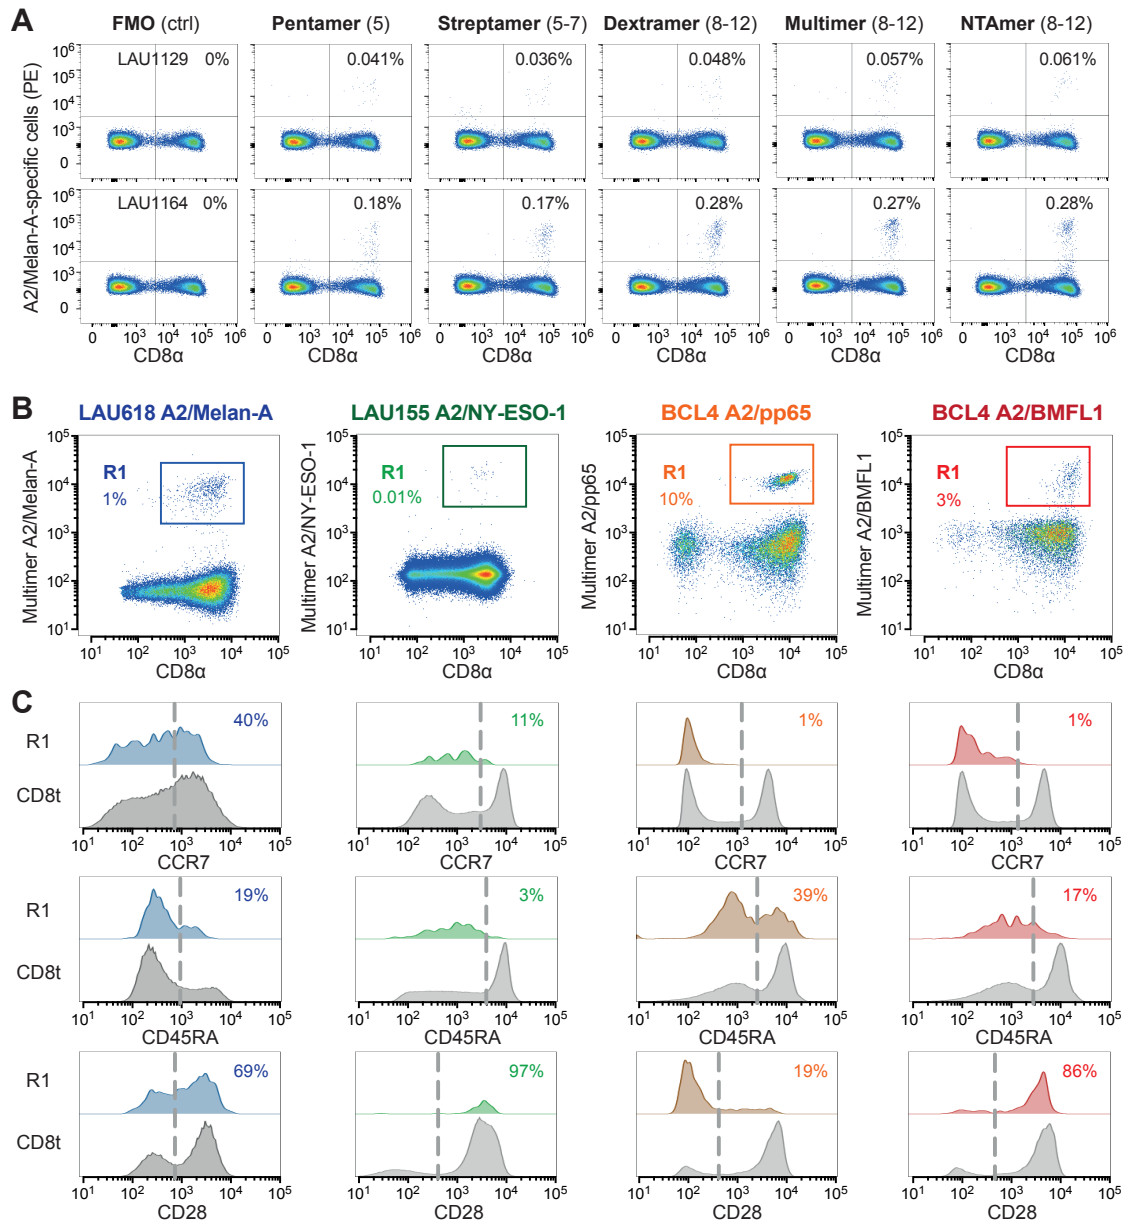

Sup Figure 1 - Allard et al.

**Supplemental Figure 1: Ex vivo detection of antigen-specific CD8 T cells using pMHC-based reagents and analysis of blood samples used to generate self/tumor- and virus-specific CD8 T cell clones. (A)** Comparison of A2/MelanA<sub>26-35</sub>-specific staining from PBMCs obtained from melanoma patients (LAU1129 and LAU1164) using PE-labeled pentamers, streptamers, multimers and NTAMers. Gating was done on live CD14<sup>-</sup>/CD16<sup>-</sup>/CD19<sup>-</sup>/CD3<sup>+</sup> lymphocytes. The valence of pMHC reagents is indicated in brackets, as well as percentages of positively stained cells. FMO (fluorescence minus one). **(B)** CD8 and multimer staining of CD8-enriched PBMCs from melanoma patients LAU618 (A2/Melan-A<sub>26-35</sub>), LAU155 (A2/NY-ESO-1<sub>157-165</sub>) and healthy donor BCL4 (A2/pp65<sub>495-504</sub> or A2/BMFL1<sub>1259-267</sub>). **(C)** CCR7, CD45RA and CD28 staining of the corresponding multimer-

specific (*RI*) and total CD8 T cell (*CD8t*) populations. Percentages of positively stained cells are indicated. Melan-A-specific CD8 T cell clones (from patient LAU618) exhibited an EM/CD28<sup>+/-</sup> phenotype, while NY-ESO-1-specific T cell clones (from patient LAU155) presented mostly an early-differentiated EM/CD28<sup>+</sup> phenotype. EBV/BMFL1-specific CD8 T cell clones were predominantly EM/CD28<sup>+</sup>, whereas CMV/pp65-specific clones mostly exhibited a differentiated EMRA/CD28<sup>-</sup> phenotype.

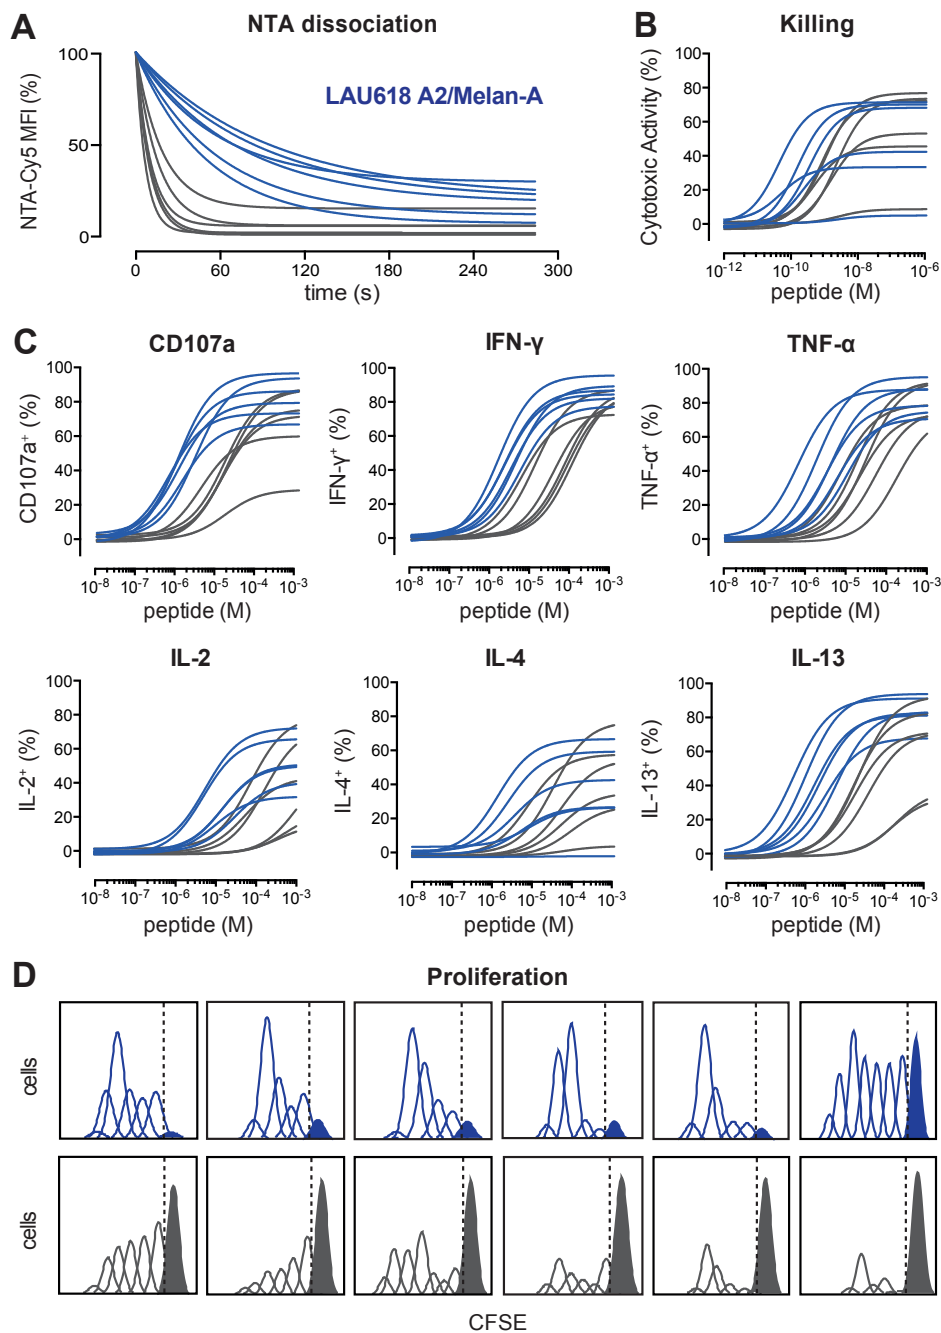

**Sup Figure 2 - Allard et al.**

**Supplemental Figure 2: *In vitro* analysis of TCR dissociation-rates versus functional avidities of self/tumor- and virus-specific CD8 T cell clones.** Representative (A) NTAmers-dissociation curves, (B) killing-, (C) CD107a degranulation-, IFN $\gamma$ -, TNF $\alpha$ -, IL-2-, IL-4- and IL-13-production titration curves and (D) proliferation analysis (by CFSE fluorescence histograms) obtained for A2/Melan-A<sub>26-35</sub>-specific CD8 T cell clones from patient LAU618, defined as slow (n = 6, blue lines) or fast (n = 6, grey lines) TCR off-rates. Non-divided and divided T cells are represented as plain and empty peaks, respectively.

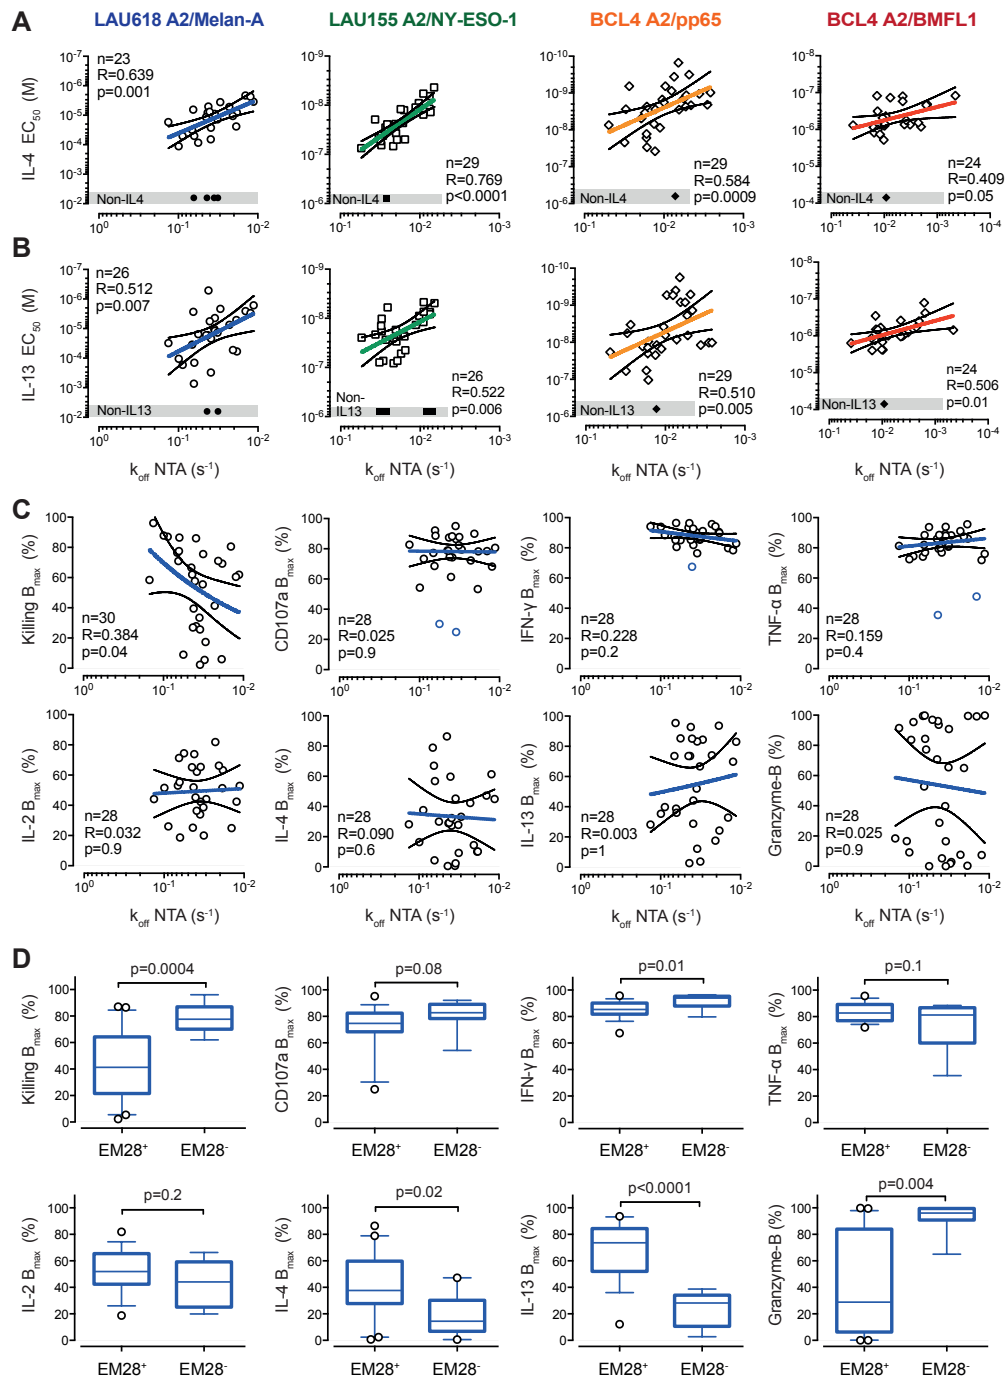

Sup Figure 3 - Allard et al.

**Supplemental Figure 3: Relationship between TCR dissociation-rates, functional avidity and maximal function capacity of self/tumor- and virus-specific CD8 T cell clones.**

Correlations between  $EC_{50}$  values from (A) IL-4- and (B) IL-13-production titration assays, and NTamer-derived TCR dissociation-rates ( $k_{off}$ ). (C) Correlations between  $B_{max}$  values from killing, CD107a-degranulation,  $IFN\gamma$ -,  $TNF\alpha$ -, IL-2-, IL-4- and IL-13-production titration assays, or percentages of granzyme-B expressing T cells, and NTamer-derived TCR dissociation-rates ( $k_{off}$ ). (A-C) Each data-point represents an A2/Melan-A<sub>26-35</sub>- (derived from patient LAU618, ○), A2/NY-ESO-1<sub>157-165</sub>- (patient LAU155, □), A2/pp65<sub>495-504</sub>- or

A2/BMFL1<sub>259-267</sub>- (healthy donor BCL4,  $\diamond$ ) specific individual T cell clone. Non-functional clones are represented in grey boxes. The number of clones displaying function  $n$ , as well as Spearman's correlation (two tailed,  $\alpha = 0.05$ ) coefficient  $R$  and  $p$  values are indicated. Color-coded and black lines are indicative of regression fitting and 95% confidence intervals, respectively. **(D)**  $B_{\max}$  values from killing, CD107a-degranulation, IFN $\gamma$ -, TNF $\alpha$ -, IL-2-, IL-4- and IL-13-production titration assays, or granzyme-B expression, of early-differentiated effector-memory EM/CD28<sup>+</sup> or late-differentiated EM/CD28<sup>-</sup> A2/Melan-A<sub>26-35</sub>-specific T cell clones derived from patient LAU618. Data are depicted as box (25<sup>th</sup> to 75<sup>th</sup> percentiles) and whisker (10<sup>th</sup> to 90<sup>th</sup> percentiles) with the middle line representing the median. Numbers of clones  $n$ , as well as Mann-Whitney (two tailed) derived  $p$  values are indicated. Of note, upon high peptide-dose stimulation (at  $B_{\max}$ , maximal response), differentiated EM/CD28<sup>-</sup>-derived CD8 T cell clones displayed higher granzyme-B expression, cytotoxic and IFN- $\gamma$  production capacity, but a lower ability to produce IL-2, IL-4 or IL-13 than memory EM/CD28<sup>+</sup> T cells.

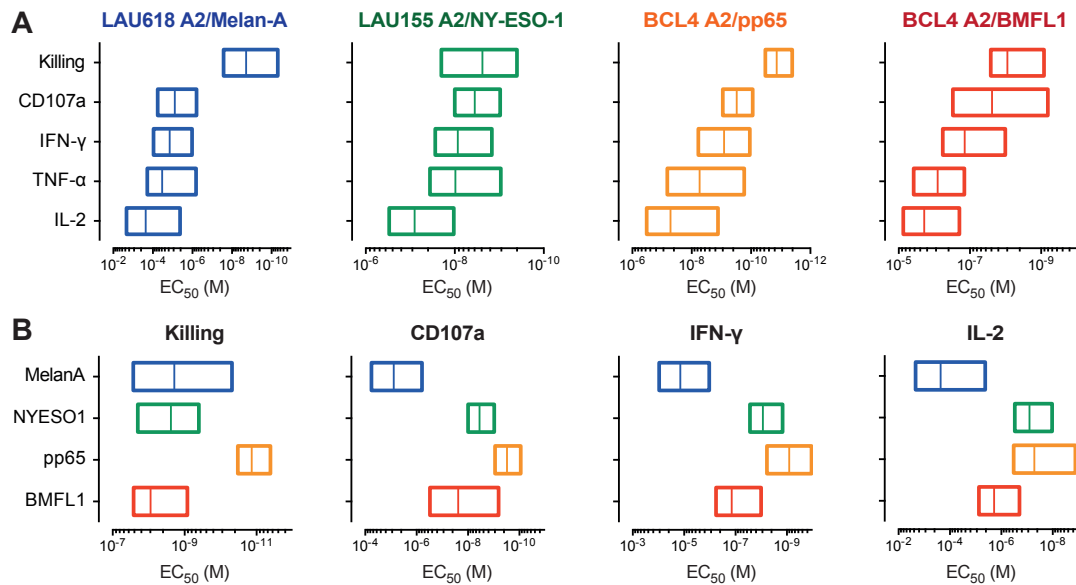

**Sup Figure 4 - Allard et al.**

**Supplemental Figure 4: Functional avidities according to the functional assay or the antigenic specificity of CD8 T cell clones.** Comparison of functional avidity ( $EC_{50}$ ) from killing-, CD107a degranulation-, IFN $\gamma$ -, TNF $\alpha$ - and IL-2-production of A2/Melan-A<sub>26-35</sub>- (derived from melanoma patient LAU618, n = 30), A2/NY-ESO-1<sub>157-165</sub>- (patient LAU155, n = 32), A2/pp65<sub>495-504</sub>- or A2/BMFL1<sub>259-267</sub>- (healthy donor BCL4, n = 30 and 26, respectively) specific CD8 T cell clones classified according to (A) the functional assay and (B) the antigenic-specificity. Data are depicted as box (minimum to maximum) with the middle line representing the mean. The representative TCR-BV clonotype diversity of each antigenic specificity is as following; LAU618/Melan-A, 77%; LAU155/NY-ESO-1, 43%; BCL4/pp65, 57%; BCL4/BMFL1, 67%.



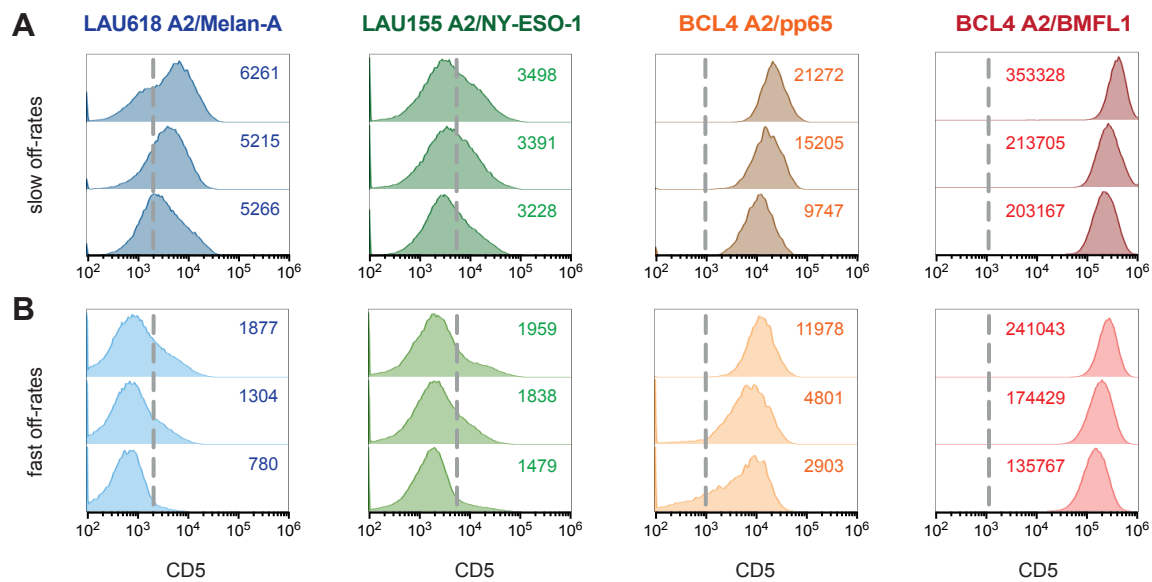

**Sup Figure 5 - Allard et al.**

**Supplemental Figure 5: CD5 expression according to the TCR-dissociation off-rate parameter and antigenic specificity of self/tumor- and virus-specific CD8 T cell clones.** CD5 surface staining was obtained at baseline (no antigen-specific stimulation) from representative antigen-specific CD8 T cells of (A) slow or (B) fast NTAmer-based off-rates. Data are depicted according to the antigenic specificity (A2/Melan-A<sub>26-35</sub>-, A2/NY-ESO-1<sub>157-165</sub>-, A2/pp65<sub>495-504</sub>- and A2/BMFL1<sub>259-267</sub> antigens). Geometric fluorescence means (gMFI) are indicated.

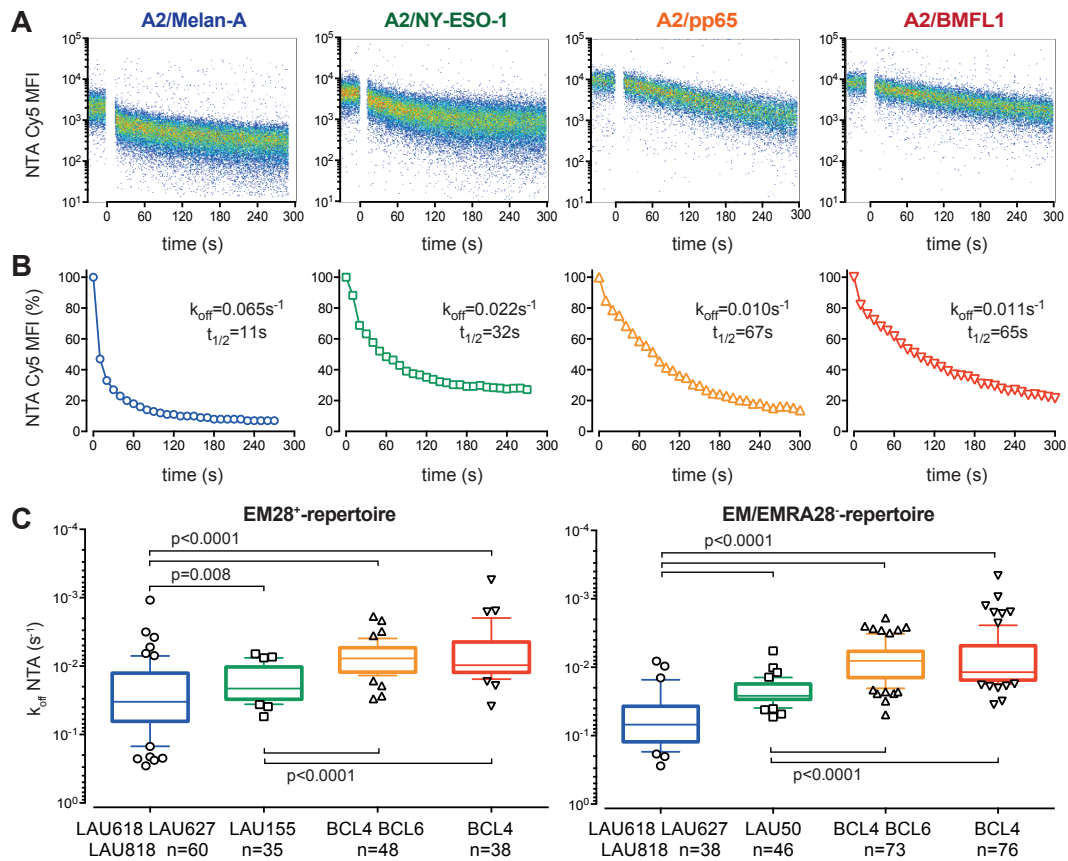

Sup Figure 6 - Allard et al.

**Supplemental Figure 6: TCR dissociation-rates according to the antigenic specificity and *ex vivo* differentiation status.** Representative (A) NTamer-dissociation staining and (B) corresponding fitting curve obtained for A2/Melan-A<sub>26-35</sub>- (○), A2/NY-ESO-1<sub>157-165</sub>- (□), A2/pp65<sub>495-504</sub>- (△) and A2/BMFL1<sub>259-267</sub>- (▽) specific CD8 T cell clones, defined as average TCR off-rates.  $k_{off}$  and  $t_{1/2}$  derived values are indicated. (C) NTamer-derived TCR dissociation-rates ( $k_{off}$ ) of early-differentiated effector-memory EM CD28<sup>+</sup> (left panel) versus late-differentiated EM/EMRA CD28<sup>-</sup> (right panel) clones specific for (i) A2/Melan-A<sub>26-35</sub> (from vaccinated melanoma patients LAU618, LAU627 and LAU818), (ii) A2/NY-ESO-1<sub>157-165</sub> (from patients LAU50 and LAU155 with naturally occurring tumor-specific T cell responses) or (iii) the persistent herpes viruses A2/pp65<sub>495-504</sub> or A2/BMFL1<sub>259-267</sub> (from healthy donors BCL4 and BCL6), categorized according to their antigenic specificity. Data are depicted as box (25<sup>th</sup> to 75<sup>th</sup> percentiles) and whisker (10<sup>th</sup> to 90<sup>th</sup> percentiles), with the middle line representing the median. Antigen specificity is depicted according to specific colored codes and symbols. Numbers of clones  $n$ , as well as Kruskal-Wallis test ( $\alpha = 0.05$ ) derived  $p$  values are indicated. Significant differences between the A2/Melan-A<sub>26-35</sub>- and the A2/NY-ESO-1<sub>157-165</sub>-specific groups were obtained by a Mann Whitney test (two tailed).

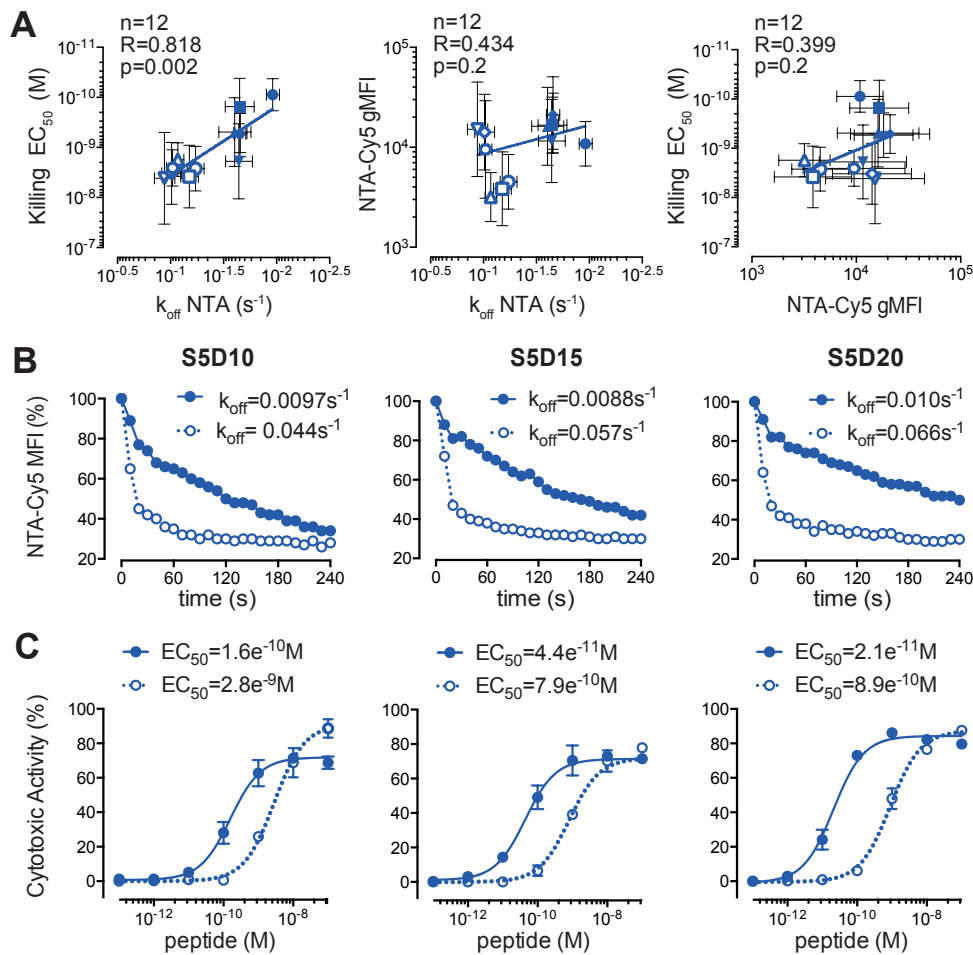

**Sup Figure 7 - Allard et al.**

**Supplemental Figure 7: Correlations between TCR dissociation rates versus pMHC multimer staining versus functional avidity of CD8 T cell clones.** (A) Correlations between NTamer-derived TCR dissociation rates ( $k_{off}$ ), NTamer surface staining levels (gMFI) and killing avidity values ( $EC_{50}$ ) obtained from independent assays ( $n = 4$  to  $9$ ) for A2/Melan-A<sub>26-35</sub>-specific CD8 T cell clones, defined as slow ( $n = 6$ , plain symbols) or fast ( $n = 6$ , empty symbols) TCR off-rates. Each symbol/clone is represented as average  $\pm$  SD. The number of clones ( $n$ ), as well as Spearman's correlation (two tailed,  $\alpha = 0.05$ ) coefficients  $R$  and  $p$  values are indicated. Lines are indicative of linear regression fitting. Representative (B) NTamer-dissociation and (C) killing-titration curves obtained at day 10 (D10), 15 (D15) and 20 (D20) following non-specific stimulation (by PHA and irradiated feeder cells) of A2/Melan-A<sub>26-35</sub>-specific CD8 T cell clones, defined as slow ( $n = 6$ , plain symbols and solid lines) or fast ( $n = 6$ , empty symbols and dotted lines) TCR off-rates. Average and SD percentages are depicted, as well as the corresponding fitting curves and  $k_{off}$  or  $EC_{50}$  derived values.
